# Supplementary material for: Vibrio Species in an Urban Tropical Estuary: Antimicrobial Susceptibility, Interaction with Environmental Parameters, and Possible Public Health Outcomes
Source: MDPI journal article supplement (doi:10.3390/microorganisms9051007), 2021-05-07
Supplement: s1 [file s1]

## SUPPLEMENTARY MATERIAL

### ***Vibrio* species in an urban tropical estuary: antimicrobial susceptibility, interaction with environmental parameters and possible public health outcomes**

Anna L. B. Canellas<sup>1</sup>, Isabelle R. Lopes<sup>1</sup>, Marianne P. Mello<sup>2</sup>, Rodolfo Paranhos<sup>2</sup>, Bruno F. R. de Oliveira<sup>1</sup>, Marinella S. Laport<sup>\*1</sup>

<sup>1</sup>Instituto de Microbiologia Paulo de Góes, Universidade Federal do Rio de Janeiro, Av. Carlos Chagas Filho, 373, Cidade Universitária, 21941-590. Rio de Janeiro, Brazil.

<sup>2</sup>Departamento de Biologia Marinha, Instituto de Biologia, Universidade Federal do Rio de Janeiro, Av. Prof. Rodolfo Rocco, 211, Cidade Universitária, 21941-617. Rio de Janeiro, Brazil.

\* Corresponding author: [marinella@micro.ufrj.br](mailto:marinella@micro.ufrj.br) (M.S. Laport<sup>\*</sup>); Phone: 55-21-2560-8344 / 133; Fax: 55-21-2560-8028.

|                              |   |
|------------------------------|---|
| 1. SUPPLEMENTARY TABLES..... | 2 |
| 1. <b>Table S1</b> .....     | 2 |
| 2. <b>Table S2</b> .....     | 3 |
| 3. <b>Table S3</b> .....     | 4 |
| 2. REFERENCES.....           | 5 |

## 1. SUPPLEMENTARY TABLES

**Table S1.** Primers and cycling conditions used in this study for the detection of beta-lactam resistance genes

| Gene                            | Primer    | Sequence                       | Cycling conditions                                                                            | Amplicon size (bp) | References |
|---------------------------------|-----------|--------------------------------|-----------------------------------------------------------------------------------------------|--------------------|------------|
| <i>bla</i> <sub>GES</sub>       | mGESF     | 5'-AGCAGCTCAGATCGGTGTTG-3'     | 95°C/10' + 30 cycles of<br>95°C/30'', 54°C/30'', 72°C/45''<br>and final extension of 72°C/10' | 750                | [1], [2]   |
|                                 | mGESR     | 5'-CCGTGCTCAGGATGAGTTG-3'      |                                                                                               |                    |            |
| <i>bla</i> <sub>SHV</sub>       | mSHVF     | 5'-CTTGACCGCTGGGAAACGG-3'      |                                                                                               | 200                |            |
|                                 | mSHVR     | 5'-AGCACGGAGCGGATCAACGG-3'     |                                                                                               |                    |            |
| <i>bla</i> <sub>TEM</sub>       | mTEMF     | 5'-CCCTTATTCCCTTTYTTGCGG-3'    |                                                                                               | 650                |            |
|                                 | mTEMR     | 5'-AACCAGCCAGCCWGAAGG-3'       |                                                                                               |                    |            |
| <i>bla</i> <sub>CTX-M-1,2</sub> | mCTX-1,2F | 5'-ATGTGCAGYACCAGTAA-3'        |                                                                                               | 512                |            |
|                                 | mCTX-1,2R | 5'-CGCTGCCGGTTTTATCSCCC-3'     |                                                                                               |                    |            |
| <i>bla</i> <sub>CTX-M-8</sub>   | mCTX-8F   | 5'-AACRCRCAGACGCTCTAC-3'       |                                                                                               | 333                |            |
|                                 | mCTX-8R   | 5'-TCGAGCCGGAASGTGTYAT-3'      |                                                                                               |                    |            |
| <i>bla</i> <sub>CTX-M-14</sub>  | mCTX-14F  | 5'-GGTGACAAAGAGARTGCAACGGAT-3' |                                                                                               | 876                |            |
|                                 | mCTX-14R  | 5'-TTACAGCCCTTCGGCGATGA-3'     |                                                                                               |                    |            |

**Table S2.** Primers and cycling conditions used in this study for the detection of heavy metal resistance genes

| Gene        | Primer  | Sequence                      | Cycling conditions                                                                 | Amplicon size (bp) | References |
|-------------|---------|-------------------------------|------------------------------------------------------------------------------------|--------------------|------------|
| <i>merA</i> | merA-F  | 5'-GTGCCGTCCAAGATCATGAT-3'    | 94°C/4' + 30 cycles of 94°C/1', 57°C/1', 72°C/1' and final extension of 72°C/8'    | 933                | [3]        |
|             | merA-R  | 5'-TAGCCYACRGTSAGCSACYTG-3'   |                                                                                    |                    |            |
|             | A1F     | 5'-ACCATCGGCGGCACCTGCGT-3'    | 95°C/5' + 35 cycles of 95°C/1', 63°C/1', 72°C/1' and final extension of 72°C/10'   | 1226               | [4]        |
|             | A5R     | 5'-ACCATCGTCAGGTAGGGGACCAA-3' |                                                                                    |                    |            |
| <i>cusB</i> | czcB-I  | 5'-ATGAAAAAATCGCGCTT-3'       | 94°C/5' + 35 cycles of 94°C/30", 47°C/45", 72°C/1' and final extension of 72°C/10' | 1200               | [5]        |
|             | czcB-II | 5'-ATGCGCATGGGTAGCACT-3'      |                                                                                    |                    |            |
| <i>copA</i> | cad1    | 5'-CAAAYTGYGCRGGAARTTYGA-3'   | 94°C/5' + 30 cycles of 94°C/1', 47°C/45", 72°C/1' and final extension of 72°C/5'   | 1058               | [6]        |
|             | cad2    | 5'-AACTAATGCACAAGGACA-3'      |                                                                                    |                    |            |
| <i>pbrA</i> | pbrA-N  | 5'-ATGAGCGAATGTGGCTCGAAG-3'   | 96°C/5' + 39 cycles of 96°C/1', 58°C/1', 72°C/ and final extension of 72°C/10'     | 2400               | [7]        |
|             | pbrA-C  | 5'-TCATCGACGCAACAGCCTCAA-3'   |                                                                                    |                    |            |

\*H = A or C or T; Y = C or T; R = A or G; W = A or T.

**Table S3.** Primer and cycling conditions used in this study for the amplification of virulence genes in *V. parahaemolyticus* strains

| Gene        | Primer         | Sequence                    | Cycling conditions                                                                        | Amplicon size (bp) | References |
|-------------|----------------|-----------------------------|-------------------------------------------------------------------------------------------|--------------------|------------|
| <i>tdh</i>  | <i>tdh</i> -F  | 5'-CCAAATACATTTTACTTGG-3'   | 94°C/5' + 30 cycles of 94°C/1',<br>55°C/45'', 72°C/45'' and final<br>extension of 72°C/7' | 251                | [8]        |
|             | <i>tdh</i> -R  | 5'-GGTACTAAATGGCTGACATC-3'  |                                                                                           |                    |            |
| <i>trh</i>  | <i>trh</i> -F  | 5'-GGCTCAAAATGGTTAAGCG-3'   | 94°C/5' + 35 cycles of 94°C/1',<br>55°C/1', 72°C/1' and final<br>extension of 72°C/7'     | 250                | [9]        |
|             | <i>trh</i> -R  | 5'-CATTTCCGCTCTCATA TGC-3'  |                                                                                           |                    |            |
| <i>toxR</i> | <i>toxR</i> -F | 5'-GTCTTCTGACGCAATCGTTG-3'  | 94°C/5' + 35 cycles of 94°C/1',<br>63°C/1', 72°C/30'' and final<br>extension of 72°C/7'   | 368                | [9]        |
|             | <i>toxR</i> -R | 5'-ATACGAGTGGTTGCTGTCATG-3' |                                                                                           |                    |            |

## 2. REFERENCES

1. Campana, E.H.; Xavier, D.E.; Petrolini, F.V.; Cordeiro-Moura, J.R.; Araujo, M.R.; Gales, A.C. Carbapenem-resistant and cephalosporin-susceptible: a worrisome phenotype among *Pseudomonas aeruginosa* clinical isolates in Brazil. *Braz. J. Infect. Dis.* **2017**, *21*(1), 57-62. <https://doi.org/10.1016/j.bjid.2016.10.008>
2. da Costa, W.F.; Giambiagi-de Marval, M.; Laport, M.S. *Shewanella* harboring antimicrobial and copper resistance genes in sea urchins (*Paracentrotus lividus*) from the Crozon peninsula (Brittany, France). *Infect. Genet. Evol.* **2020**, *85*, 104437. <https://doi.org/10.1016/j.meegid.2020.104437>
3. Deredjian, A.; Colignon, C.; Brothier, E.; Favre-Bonté, S.; Cournoyer, B.; Nazaret, S. Antibiotic and metal resistance among hospital and outdoor strain of *Pseudomonas aeruginosa*. *Res. Microbiol.* **2011**, *162*, 689-700. <https://doi.org/10.1016/j.resmic.2011.06.007>
4. De, J.; Ramaiah N.; Vardanyan, L. Detoxification of toxic heavy metals by marine bacteria highly resistant to mercury. *Mar. Biotechnol.* **2008**, *10*, 471-477. <https://doi.org/10.1007/s10126-008-9083-z>
5. Khan, Z.; Nisar, M.A.; Hussain, S.Z.; Arshad, M.N.; Rehman, A. Cadmium resistance mechanism in *Escherichia coli* P4 and its potential use to bioremediate environmental cadmium. *Appl. Microbiol. Biotechnol.* **2015**, *99*, 10745-10757. <https://doi.org/10.1007/s00253-015-6901-x>
6. Oger, C.; Bertheb, T.; Quilleta, L.; Barraya, S.; Chiffolleau, J.F.; Petit, F. Estimation of the abundance of the cadmium resistance gene *cadA* in microbial communities in polluted estuary water. *Res. Microbiol.* **2001**, *152*, 671-678. [https://doi.org/10.1016/S0923-2508\(01\)01246-3](https://doi.org/10.1016/S0923-2508(01)01246-3)
7. Borremans, B.; Hobman, J.L.; Provoost, A.; Brown, N.L.; van-Der-Lelie, D. Cloning and functional analysis of the *pbr* lead resistance determinant of *Ralstonia metallidurans* CH34. *J. Bacteriol.* **2001**, *183*, 5651-5658. <https://doi.org/10.1128/JB.183.19.5651-5658.2001>
8. Tada, J.; Ohashi, T.; Nishimura, N.; Shirasaki, Y.; Ozaki, H.; Fukushima, S.; Takano, J.; Nishibuchi, M.; Takeda, Y. Detection of the thermostable direct hemolysin gene (*tdh*) and the thermostable direct hemolysin-related hemolysin gene (*trh*) of *Vibrio parahaemolyticus* by polymerase chain reaction. *Mol. Cell. Probes.* **1992**, *6*(6), 477-487. [https://doi.org/10.1016/0890-8508\(92\)90044-X](https://doi.org/10.1016/0890-8508(92)90044-X)
9. Kim, Y.B.; Okuda, J.U.N.; Matsumoto, C.; Takahashi, N.; Hashimoto, S.; Nishibuchi, M. Identification of *Vibrio parahaemolyticus* strains at the species level by PCR targeted to the *toxR* gene. *J. Clin. Microbiol.* **1999**, *37*(4), 1173-1177.
